# Supplementary material for: Mitochondrial fusion regulates proliferation and differentiation in the type II neuroblast lineage in Drosophila
Source: PLoS Genet. 2022 Feb 14;18(2):e1010055. doi: 10.1371/journal.pgen.1010055 (PMC8880953; doi:10.1371/journal.pgen.1010055)
Supplement: S1 Data — (XLSX) [file pgen.1010055.s011.xlsx]

## Sheet: Average mitochondrial area 
mCherry RNAi				opa1 RNAi				marf RNAi				Drp1SD
n= 3 Brains	Type II NBs	Avg. Mito.Area		n= 3 Brains	Type II NBs	Avg. Mito.Area		n= 3 Brains	Type II NBs	Avg. Mito.Area		n=3 Brains	Type II NBs	Avg. Mito.Area
	1	0.529			1	0.248			1	0.271			1	6.238
	2	0.459			2	0.268			2	0.193			2	5.206
	3	0.36			3	0.233			3	0.232			3	3.03
	4	0.424			4	0.205			4	0.271			4	3.015
	5	0.449			5	0.179			5	0.203			5	2.477
	6	0.3			6	0.192			6	0.222			6	1.206
									7	0.334
									8	0.315
									9	0.181
									10	0.212
									11	0.232
									12	0.264
									13	0.217
									14	0.231
									15	0.229
									16	0.233
									17	0.254
									18	0.276
									19	0.291

## Sheet: Mitochondria in mINPs
Genotype	Brains	Lineages	fragmented	intermediate	Clustered	total mINPs counted
mCherry RNAi	B1-1	1	1	4	0	5
	B1-2	1	0	3	1	4
	B2-1	1	2	3	0	5
		1	1	5	0	6
	B3-1	1	0	4	1	5
	B4-1	1	0	3	1	4
		1	0	4	1	5
	B-5	1	1	4	1	6
	Total	8	5	30	5	40
	%		12.5	75	12.5
Genotype	Brains	Lineages	fragmented	intermediate	Clustered	total mINPs counted
Opa 1 RNAi	B1-1	1	5	1	0	6
		1	3	2	0	5
	B1-2	1	4	1	0	5
	B2-1	1	5	1	0	6
		1	4	1	0	5
	B3-1	1	5	1	0	6
		1	3	2	0	5
	B3-2	1	4	1	0	5
		1	4	0	0	4
	Total	9	37	10	0	47
	%		78.7234	21.2766	0
Genotype	Brains	Lineages	fragmented	intermediate	Clustered	total mINPs counted
Marf MG	B1-1	1	3	2	0	5
		1	4	2	0	6
	B2-1	1	3	2	0	5
	B3-1	1	3	2	0	5
	Total	4	13	8	0	21
	%		61.9048	38.0952	0
Genotype	Brains	Lineages	fragmented	intermediate	Clustered	total mINPs counted
Drp1SD	B1-1	1	0	1	4	5
		1	0	2	4	6
	B2-1	1	0	0	6	6
		1	0	1	5	6
	B3-1	1	0	1	4	5
		1	0	2	4	6
	Total	6	0	7	27	34
	%		0	20.58	79.4118
