# Supplementary material for: Mitochondrial fusion regulates proliferation and differentiation in the type II neuroblast lineage in Drosophila
Source: PLoS Genet. 2022 Feb 14;18(2):e1010055. doi: 10.1371/journal.pgen.1010055 (PMC8880953; doi:10.1371/journal.pgen.1010055)
Supplement: S4 Data — (XLSX) [file pgen.1010055.s014.xlsx]

## Sheet: TMRM Analysis
Control				Drp1SD;mCherry RNAi				Opa1 RNAi				Drp1SD;Opa1 RNAi				Marf RNAi				Drp1SD;Marf RNAi
	Avg TMRM intensity	Normalised to control			Avg TMRM intensity	Normalised to control			Avg TMRM intensity	Normalised to control			Avg TMRM intensity	Normalised to control			Avg TMRM intensity	Normalised to control			Avg TMRM intensity	Normalised to control
n=8	103.368	1.15463		n=5	67.4755	0.753706		n=5	18.7994	0.209991		n=4	111.844	1.2493		n=5	33.1037	0.36977		n=4	54.816	0.612298
	123.15	1.37559			79.2599	0.885338			37.4878	0.418741			73.8184	0.824556			54.0967	0.604264			117.176	1.30886
	72.5779	0.8107			75.1162	0.839053			33.1736	0.370551			78.856	0.880826			50.8687	0.568206			72.7254	0.812348
	72.1744	0.806193			104.81	1.17074			45.2112	0.505012			49.8365	0.556677			38.6369	0.431577			92.5611	1.03391
	67.1655	0.750243			57.1782	0.638684			53.4247	0.596757			105.738	1.18111			39.7289	0.443774			84.1117	0.939533
	79.8438	0.89186			74.9773	0.837501			19.5538	0.218417			63.8323	0.71301			65.0113	0.72618			68.2283	0.762114
	73.5587	0.821656			92.7446	1.03596			29.6661	0.331373							38.4536	0.429529			49.8659	0.557005
	89.1889	0.996245			77.5675	0.866434			38.5347	0.430435											113.311	1.26569
	92.8913	1.0376			76.7455	0.857252			35.2824	0.394106
	79.6902	0.890145							44.7078	0.499389
	132.789	1.48326							36.7525	0.410528
	93.2866	1.04202
	106.492	1.18953
	123.29	1.37715
	90.9885	1.01635
																																Drp1SD;Opa1 Trip			Drp1SD;MarfMG

## Sheet: Cytochrome C analysis
		+/+'	8 Brains					Opa1 RNAi	7 Brains					Marf RNAi	7 Brains
	NBs	Cyto	Nucl	C/N	Normalized to control		NBs	Cyto	Nucl	C/N	Normalized to control		NBs	Cyto	Nucl	C/N	Normalized to control
	1	1218.38	517.949	2.35231	1.3249		1	1450.76	345.505	4.19895	2.36499		1	880.031	562.993	1.56313	0.880409
	2	1152.72	673.988	1.7103	0.963299		2	1086.27	326.012	3.33198	1.87669		2	910.79	447.662	2.03455	1.14593
	3	1197.02	657.177	1.82145	1.0259		3	1470.44	345.162	4.26014	2.39946		3	758.842	450.612	1.68403	0.948501
	4	1269.11	642.289	1.97591	1.1129		4	1244.42	372.807	3.33798	1.88006		4	918.69	505.137	1.81869	1.02435
	5	981.073	506.472	1.93707	1.09103		5	1129.05	341.818	3.30307	1.8604		5	1061.44	610.136	1.73968	0.979846
	6	899.308	601.892	1.49414	0.841549		6	1375.16	378.928	3.62908	2.04402		6	793.601	544.03	1.45874	0.821616
	7	838.197	493.259	1.6993	0.957107		7	1524.94	357.034	4.27114	2.40565		7	791.932	410.578	1.92882	1.08638
	8	640.148	460.39	1.39045	0.783148		8	1336.99	414.806	3.22317	1.8154		8	822.5	414.303	1.98526	1.11817
	9	915.544	529.85	1.72793	0.97323		9	1461.75	427.248	3.42132	1.92701		9	935.695	409.834	2.28311	1.28592
	10	1048.01	620.95	1.68776	0.950602		10	1443.79	588.804	2.45207	1.38109		10	709.691	408.54	1.73714	0.978417
	11	1100.75	544.766	2.02059	1.13807		11	1397.31	384.763	3.6316	2.04544		11	709.143	333.317	2.12753	1.1983
	12	1001.31	608.809	1.6447	0.926351		12	1334.12	383.114	3.48231	1.96135		12	590.537	333.358	1.77148	0.997759
	13	886.331	468.168	1.89319	1.06631		13	1117.12	275.821	4.05016	2.28119		13	813.999	450.124	1.80839	1.01855
	14	931.222	466.638	1.9956	1.12399		14	1271.09	559.251	2.27284	1.28014		14	1001.14	618.792	1.61789	0.911253
	15	851.149	603.455	1.41046	0.79442		15	1192.04	380.004	3.13691	1.76681		15	1181.87	718.746	1.64435	0.926154
	16	920.332	522.713	1.76068	0.991678		16	1317.22	349.941	3.76411	2.12008		16	1348.88	726.099	1.85771	1.04633
	17	888.978	514.883	1.72656	0.97246		17	1145.01	338.412	3.38347	1.90569		17	1331.37	791.04	1.68306	0.947958
	18	836.191	408.484	2.04706	1.15297		18	1489.02	492.754	3.02182	1.70199		18	1285.26	872.707	1.47273	0.829491
	19	827.305	575.211	1.43826	0.81008		19	1091.05	455.754	2.39395	1.34836		19	1048.7	699.029	1.50022	0.844977
							20	1130.15	441.807	2.55802	1.44076		20	1255.53	787.898	1.59351	0.897522
							21	1426.5	616.584	2.31355	1.30307		21	1260.58	696.205	1.81065	1.01982
							22	1415.88	401.283	3.52838	1.9873		22	1377.49	696.038	1.97905	1.11467
													23	1322.78	712.861	1.8556	1.04514
