# Supplementary material for: Mitochondrial fusion regulates proliferation and differentiation in the type II neuroblast lineage in Drosophila
Source: PLoS Genet. 2022 Feb 14;18(2):e1010055. doi: 10.1371/journal.pgen.1010055 (PMC8880953; doi:10.1371/journal.pgen.1010055)
Supplement: S10 Data — (XLSX) [file pgen.1010055.s020.xlsx]

## Sheet: NB number per hemisphere
wor>+/+						wor>opa1 RNAi					wor>marf RNAi						wor>Drp1SD
	Hemispheres	NB number per hemisphere				Hemispheres	NB number per hemisphere					Hemispheres	NB number per hemisphere					Hemispheres	NB number per hemisphere
n= 13 Brains	1	101			n= 10 Brains	1	98				n= 10 Brains	1	101				n= 10 Brains	1	94
	2	98				2	99					2	103					2	98
	3	105				3	99					3	100					3	100
	4	96				4	95					4	96					4	99
	5	98				5	101					5	93					5	104
	6	101				6	99					6	96					6	96
	7	98				7	92					7	87					7	101
	8	99				8	102					8	87					8	101
	9	94				9	96					9	95					9	103
	10	99				10	93					10	96					10	96
	11	99
	12	94
	13	101

## Sheet: Pros+cells per hemisphere
wor>+/+						wor>opa1 RNAi					wor>marf RNAi						wor>Drp1SD
	Hemispheres	Pros cells per hemisphere				Hemispheres	Pros cells per hemisphere					Hemispheres	Pros cells per hemisphere					Hemispheres	Pros cells per hemisphere
n= 10 Brains	1	1568			n= 11 Brains	1	608				n= 7 Brains	1	876				n= 11 Brains	1	912
	2	1084				2	669					2	1763					2	1110
	3	1711				3	665					3	1783					3	1265
	4	1393				4	519					4	1253					4	1220
	5	1378				5	745					5	1579					5	1011
	6	1066				6	404					6	917					6	1134
	7	1156				7	674					7	1297					7	1172
	8	2046				8	655											8	1557
	9	1741				9	862											9	1875
	10	1933				10	546											10	1531
						11	362											11	2223
