# Supplementary material for: Mitochondrial fusion regulates proliferation and differentiation in the type II neuroblast lineage in Drosophila
Source: PLoS Genet. 2022 Feb 14;18(2):e1010055. doi: 10.1371/journal.pgen.1010055 (PMC8880953; doi:10.1371/journal.pgen.1010055)
Supplement: S16 Data — (XLSX) [file pgen.1010055.s026.xlsx]

## Sheet: Type II NBs
WT	pnt>NV5	pnt>NV5;marfi	pnt>NV5;opa1i
7.99999	68	31	25
8	75	26	21
8	53	45	22
8	56	37	23
8	89	30	24
8	91	32	25
8	69	31	24
8	66	37	20
8	53	30	27
8	54
8	78
8
8
8

## Sheet: Mitochondria in mINPs
Genotype	Brains	Lineages	fragmented	intermediate	Clustered	total mINPs counted
Notch RNAi	B1-1	1	3	2	0	5
		1	4	2	0	6
	B1-2	1	4	2	0	6
		1	3	1	0	4
	B2-1	1	3	1	0	4
		1	4	1	0	5
	B3-1	1	3	1	0	4
		1	4	1	0	5
	B4-1	1	3	2	0	5
		1	3	2	0	5
	Total	10	34	15	0	49
	%		69.3878	30.6122	0	100
Genotype	Brains	Lineages	fragmented	intermediate	Clustered	total mINPs counted
NV5 OE	B1-1	1	0	2	3	5
		1	0	2	4	6
	B1-2	1	0	1	5	6
		1	0	2	4	6
		1	0	2	3	5
	B2-1	1	0	1	4	5
		1	0	2	3	5
		1	0	1	4	5
	B3-1	1	0	2	4	6
		1	0	1	3	4
	B4-1	1	0	1	4	5
		1	0	2	3	5
		1	0	2	3	5
	Total	13	0	21	47	68
	%		0	30.8824	69.1176
Genotype	Brains	Lineages	fragmented	intermediate	Clustered	total mINPs counted
Su(H) RNAi	B1-1	1	2	0	0	2
	B2-1	1	1	0	0	1
	B3-1	1	2	0	0	2
		1	4	2	0	6
	Total	4	9	2	0	11
	%		81.8182	18.1818	0
Genotype	Brains	Lineages	fragmented	intermediate	Clustered	total mINPs counted
mCherry RNAi	B1-1	1	1	4	0	5
	B1-2	1	0	3	1	4
	B2-1	1	2	3	0	5
		1	1	5	0	6
	B3-1	1	0	4	1	5
	B4-1	1	0	3	1	4
		1	0	4	1	5
	B-5	1	1	4	1	6
	Total	8	5	30	5	40
	%		12.5	75	12.5
